# Supplementary material for: Synergistic Engineering of CoO/MnO Heterostructures Integrated with Nitrogen-Doped Carbon Nanofibers for Lithium-Ion Batteries
Source: MDPI journal article supplement (doi:10.3390/molecules29102228), 2024-05-09
Supplement: s1 [file s1]

**Figure S1** SEM images of MnO/NC and CoO/NC.

**Figure S2** SAED pattern of CoO/MnO/NC with complex polycrystalline diffraction spots that corresponds to the MnO and CoO phase.

**Figure S3** (a) XPS survey spectrum and (b) high-resolution XPS spectras for O 1s of CoO/MnO/NC.

**Figure S4** Comparison of the cyclic performances of CoO/MnO/NC with different Mn/Co ratios at  $0.1 \text{ A g}^{-1}$ .

**Figure S5** The galvanostatic discharge/charge voltage profiles of CoO/MnO/NC at  $0.1 \text{ A g}^{-1}$ .

**Figure S6** Comparison of the cyclic stability of CoO/MnO/NC, MnO/NC and CoO/NC.

**Figure S7** (a) CV curves of MnO/NC at different scan rates. (b) Log (i) vs. log (v) plots at each redox peak of MnO/NC. (c) Capacitive contribution to the total capacity of MnO/NC at  $1 \text{ mV s}^{-1}$ . (d) The capacitance contribution percentage of MnO/NC at different scan rates.

**Figure S8** The crystalline structure of CoO (a) and MnO (b).

**Figure S9** Calculated TDOS of CoO/MnO, MnO and CoO.

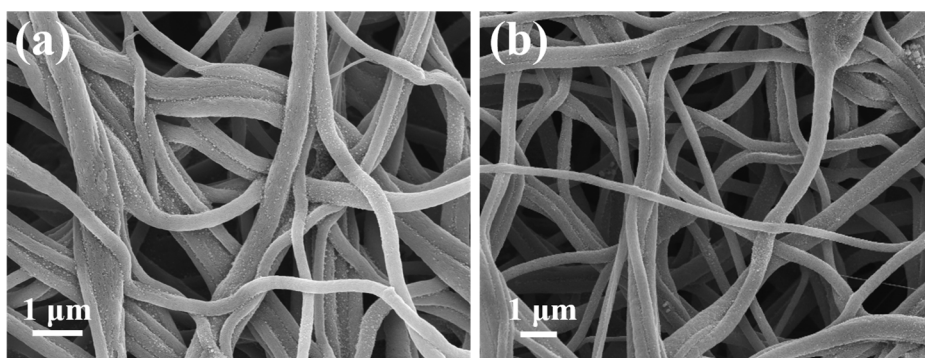

**Figure S1** SEM images of MnO/NC and CoO/NC.

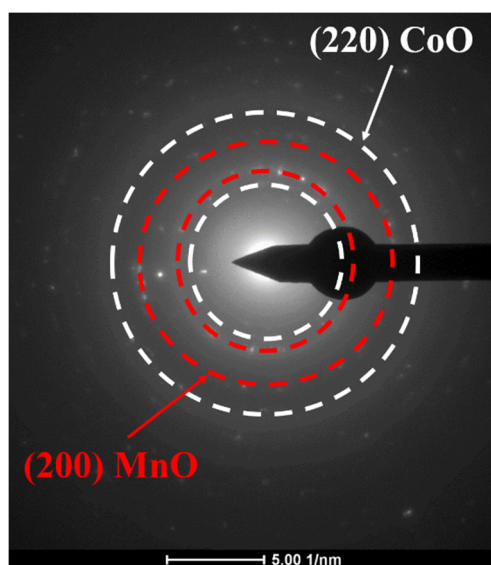

**Figure S2** SAED pattern of CoO/MnO/NC with complex polycrystalline diffraction spots that corresponds to the MnO and CoO phase.

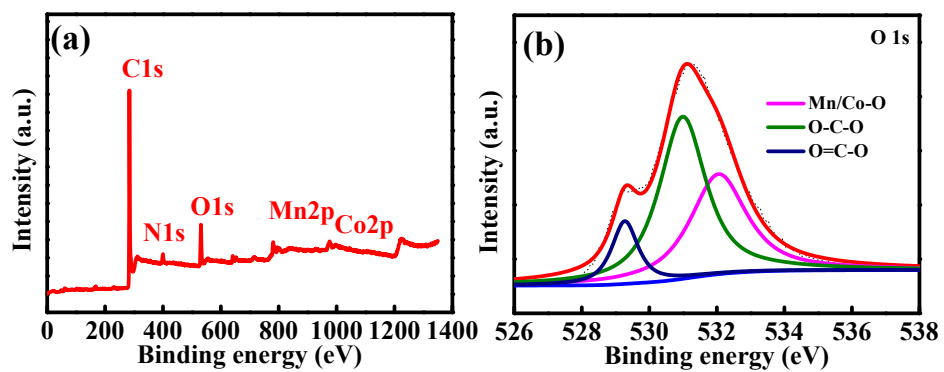

**Figure S3** (a) XPS survey spectrum and (b) high-resolution XPS spectras for O 1s of CoO/MnO/NC.

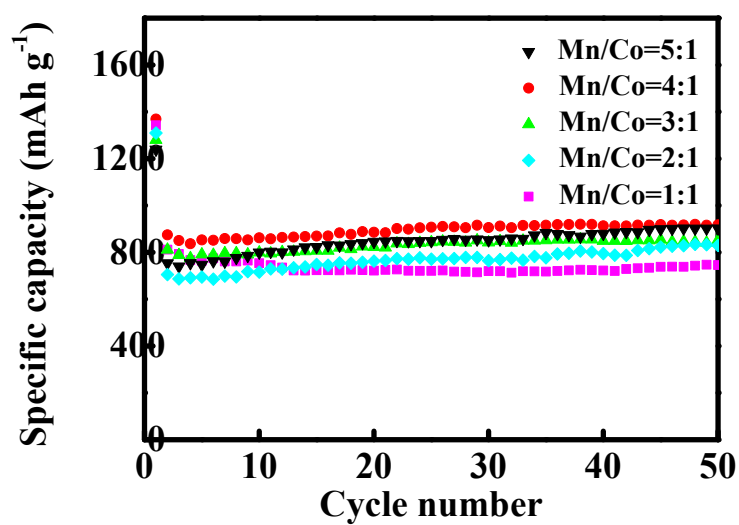

**Figure S4** Comparison of the cyclic performances of CoO/MnO/NC with different Mn/Co ratios at 0.1 A g<sup>-1</sup>.

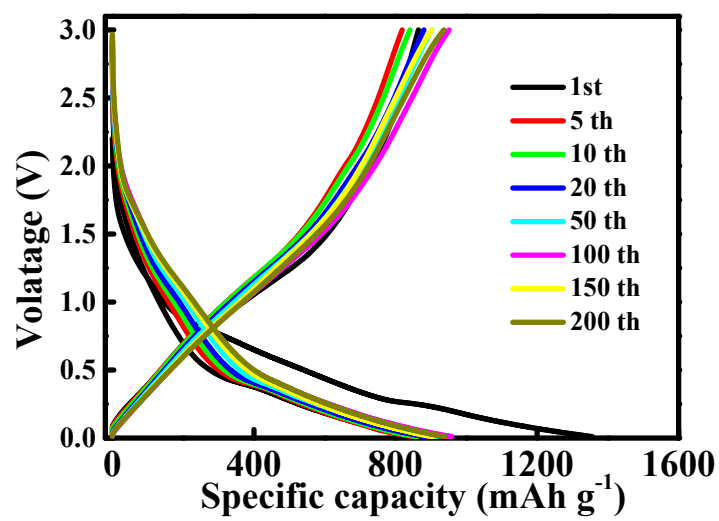

**Figure S5** The galvanostatic discharge/charge voltage profiles of CoO/MnO/NC at 0.1 A g<sup>-1</sup>.

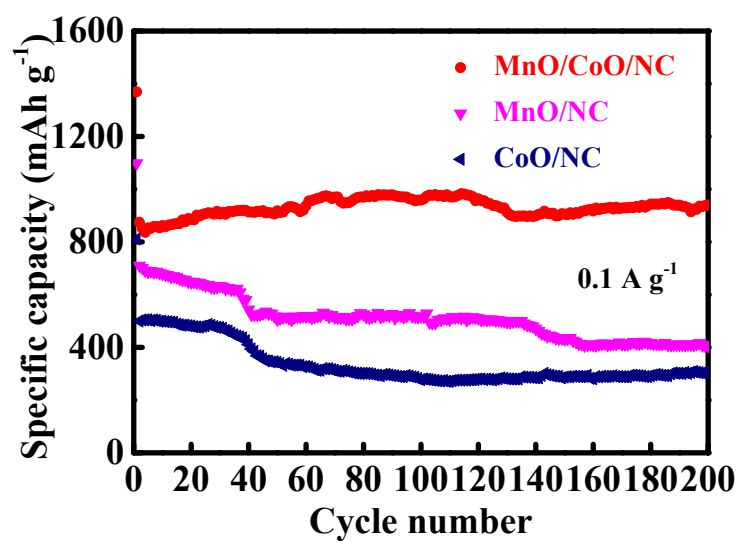

**Figure S6** Comparison of the cyclic stability of CoO/MnO/NC, MnO/NC and CoO/NC.

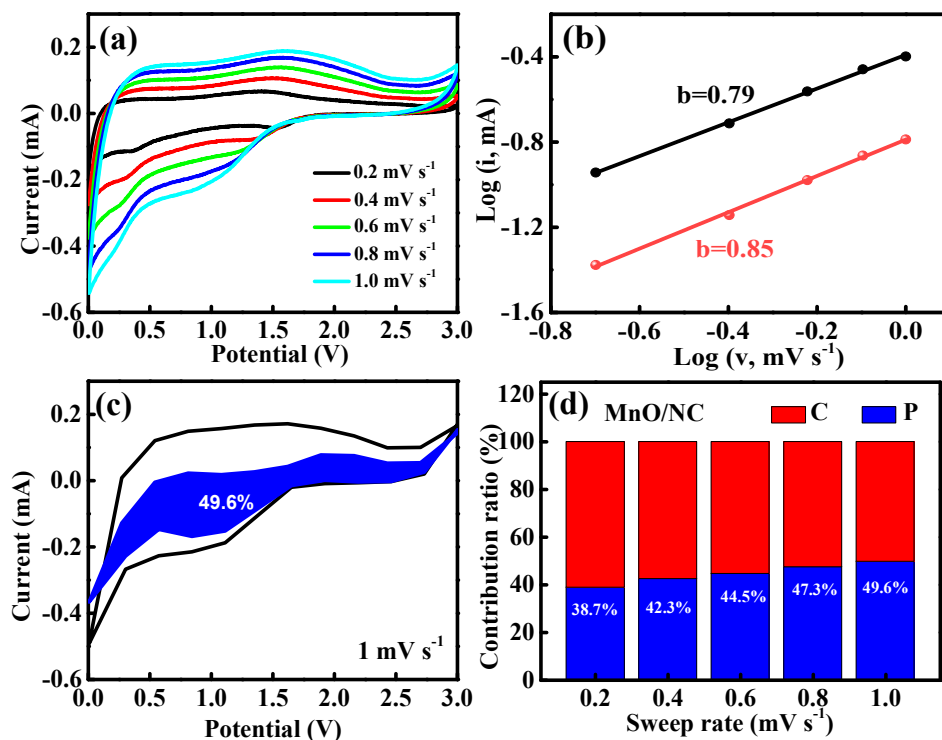

**Figure S7** (a) CV curves of MnO/NC at different scan rates. (b) Log ( $i$ ) vs. log ( $v$ ) plots at each redox peak of MnO/NC. (c) Capacitive contribution to the total capacity of MnO/NC at 1  $\text{mV s}^{-1}$ . (d) The capacitance contribution percentage of MnO/NC at different scan rates.



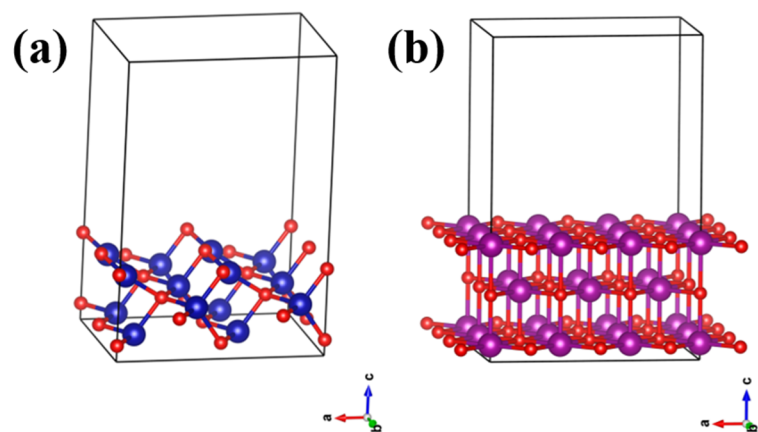

**Figure S8** The crystalline structure of CoO (a) and MnO (b).

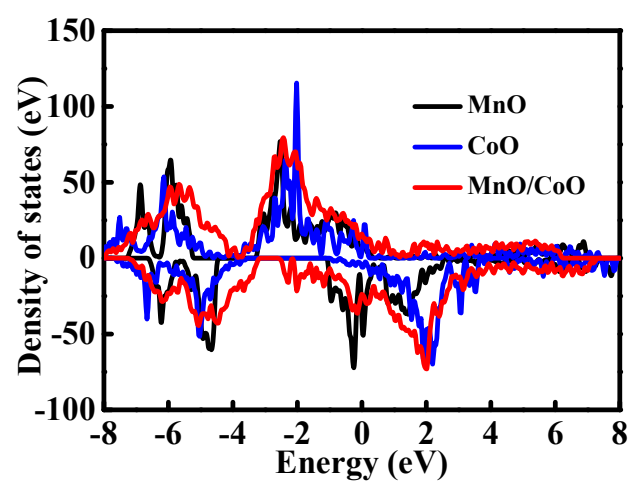

**Figure S9** Calculated TDOS of CoO/MnO, MnO and CoO.
